# Supplementary material for: Effective extraction and determination of 24 quinolones in water and egg samples using a novel magnetic covalent organic framework combined with UPLC-MS/MS
Source: Royal Society of Chemistry journal article supplement (doi:10.1039/d4ra00247d), 2024-01-01
Supplement: d4ra00247d1.pdf [file d4ra00247d1.pdf]

## Supplementary Data

Effective extraction and determination of 24 quinolones in water and egg samples by a novel magnetic covalent organic framework combined with UPLC-MS/MS

Na Li,<sup>a</sup> Mengnan Liang,<sup>a</sup> Hao Zhang,<sup>a</sup> Zhongxia Hua,<sup>bc</sup> Ling Ma,<sup>\*bc</sup> Yanyu Qi<sup>\*a</sup> and Ke Wang<sup>\*abc</sup>

<sup>a</sup> College of Chemistry and Materials Science, Hebei Normal University, Shijiazhuang 050023, China

<sup>b</sup> Shijiazhuang Center for Disease Control and Prevention, Shijiazhuang 050011, China

<sup>c</sup> Shijiazhuang Technology Innovation Center for Chemical Poison Detection and Risk Early Warning, Shijiazhuang 050011, China

\* Corresponding authors at: College of Chemistry and Materials Science, Hebei Normal University, Shijiazhuang, China; Shijiazhuang Center for Disease Control and Prevention, Shijiazhuang, China; Shijiazhuang Technology Innovation Center for Chemical Poison Detection and Risk Early Warning, Shijiazhuang, China

E-mail addresses: wkecdc@163.com, mamalin001@163.com, hbsdqyy@hebtu.edu.cn.

### Table of contents

**Table. S1.** The properties of 24 kinds of QNs.

**Table. S2.** Mass spectrometry conditions of 24 kinds of QNs.

**Table. S3.** Matrix effects of 24 QNs.

**Table. S4.** The Recoveries and RSDs of 24 kinds of QNs spiked at three levels in the in water and egg samples (n=5).

**Fig. S1.** Optimization of MSPE parameters.

**Fig. S2.** Reusable times of Fe<sub>3</sub>O<sub>4</sub>@SiO<sub>2</sub>@Ah-COF.

**Fig. S3.** Chromatograms of 24 kinds of QNs.

**Table. S1.** The properties of 24 kinds of QNs.

| Quinolones    | Abbreviation | CAS         | Molecular formula                                                            | Molecular mass | Purity (%) |
|---------------|--------------|-------------|------------------------------------------------------------------------------|----------------|------------|
| Lufloxacin    | LuFu         | 101363-10-4 | C <sub>17</sub> H <sub>18</sub> FN <sub>3</sub> O <sub>3</sub> S             | 363.41         | 99.9       |
| Enoxacin      | ENO          | 74011-58-8  | C <sub>15</sub> H <sub>17</sub> FN <sub>4</sub> O <sub>3</sub>               | 320.32         | 99.9       |
| Norfloxacin   | NOR          | 70458-96-7  | C <sub>16</sub> H <sub>18</sub> FN <sub>3</sub> O <sub>3</sub>               | 319.33         | 99.8       |
| Fleroxacin    | FuLuo        | 79660-72-3  | C <sub>17</sub> H <sub>18</sub> F <sub>3</sub> N <sub>3</sub> O <sub>3</sub> | 369.34         | 99.9       |
| Ofloxacin     | OFL          | 82419-36-1  | C <sub>18</sub> H <sub>20</sub> FN <sub>3</sub> O <sub>4</sub>               | 361.37         | 99.5       |
| Pefloxacin    | PEF          | 70458-92-3  | C <sub>17</sub> H <sub>20</sub> FN <sub>3</sub> O                            | 333.36         | 99.3       |
| Antofloxacin  | ANT          | 873888-67-6 | C <sub>18</sub> H <sub>21</sub> FN <sub>4</sub> O <sub>4</sub>               | 376.38         | 99.5       |
| Ciprofloxacin | CIP          | 85721-33-1  | C <sub>17</sub> H <sub>18</sub> FN <sub>3</sub> O <sub>3</sub>               | 331.34         | 98.0       |
| Lomefloxacin  | LOM          | 98079-57-1  | C <sub>17</sub> H <sub>19</sub> F <sub>2</sub> N <sub>3</sub> O <sub>3</sub> | 351.35         | 99.8       |
| Rosoxacin     | Luosuo       | 40034-42-2  | C <sub>17</sub> H <sub>14</sub> N <sub>2</sub> O <sub>3</sub>                | 294.30         | 99.3       |
| Danofloxacin  | DaNuo        | 112398-08-0 | C <sub>19</sub> H <sub>20</sub> FN <sub>3</sub> O <sub>3</sub>               | 357.38         | 99.9       |
| Enrofloxacin  | ENR          | 93106-60-6  | C <sub>19</sub> H <sub>22</sub> FN <sub>3</sub> O <sub>3</sub>               | 359.39         | 99.9       |
| Orbifloxacin  | ORB          | 113617-63-1 | C <sub>19</sub> H <sub>20</sub> F <sub>3</sub> N <sub>3</sub> O <sub>3</sub> | 395.38         | 99.8       |
| Gatifloxacin  | GAT          | 112811-59-3 | C <sub>19</sub> H <sub>22</sub> FN <sub>3</sub> O <sub>4</sub>               | 375.39         | 99.6       |
| Sarafloxacin  | SAR          | 98105-99-8  | C <sub>20</sub> H <sub>17</sub> F <sub>2</sub> N <sub>3</sub> O <sub>3</sub> | 385.36         | 99.5       |
| Difloxacin    | DIF          | 98106-17-3  | C <sub>21</sub> H <sub>19</sub> F <sub>2</sub> N <sub>3</sub> O <sub>3</sub> | 399.39         | 99.9       |
| Sparfloxacin  | SPA          | 110871-86-8 | C <sub>19</sub> H <sub>22</sub> F <sub>2</sub> N <sub>4</sub> O <sub>3</sub> | 392.40         | 99.8       |
| Gemifloxacin  | GEM          | 175463-14-6 | C <sub>18</sub> H <sub>20</sub> FN <sub>5</sub> O <sub>4</sub>               | 389.38         | 99.6       |
| Moxifloxacin  | MOX          | 86826-86-8  | C <sub>21</sub> H <sub>25</sub> ClFN <sub>3</sub> O <sub>4</sub>             | 401.43         | 99.5       |
| Tosufloxacin  | TOS          | 108138-46-1 | C <sub>19</sub> H <sub>15</sub> F <sub>3</sub> N <sub>4</sub> O <sub>3</sub> | 404.34         | 70.6       |
| Balofloxacin  | BAL          | 127294-70-6 | C <sub>20</sub> H <sub>24</sub> FN <sub>3</sub> O <sub>4</sub>               | 389.42         | 99.9       |
| Temafloxacin  | TIMA         | 108319-06-8 | C <sub>21</sub> H <sub>18</sub> F <sub>3</sub> N <sub>3</sub> O <sub>3</sub> | 417.38         | 99.6       |
| Milofloxacin  | MILO         | 37065-29-5  | C <sub>12</sub> H <sub>9</sub> NO <sub>6</sub>                               | 263.20         | 95.2       |
| Garenoxacin   | Jialei       | 194804-75-6 | C <sub>23</sub> H <sub>20</sub> F <sub>2</sub> N <sub>2</sub> O <sub>4</sub> | 426.41         | 99.9       |

**Table. S2.** Mass spectrometry conditions of 24 kinds of QNs.

| Compounds | Retention (min) | Precursor ion (m/z) | Declustering potential (V) | Product ion (m/z) | Collision energy (eV) |
|-----------|-----------------|---------------------|----------------------------|-------------------|-----------------------|
| LuFu      | 3.44            | 364.1               | 125                        | 346.2*, 320.2     | 18/22                 |
| ENO       | 3.66            | 321.1               | 110                        | 330.1*, 234.1     | 18/22                 |
| NOR       | 4.18            | 320.1               | 115                        | 276.0*, 233.0     | 18/25                 |
| FuLuo     | 4.22            | 370.1               | 130                        | 326.1*, 269.1     | 20/26                 |
| OFL       | 4.28            | 362.2               | 130                        | 318.0*, 218.2     | 22/24                 |
| PEF       | 4.46            | 334.1               | 120                        | 316.1*, 290.1     | 20/18                 |
| ANT       | 4.61            | 377.1               | 125                        | 333.3*, 276.0     | 20/22                 |
| CIP       | 4.63            | 332.1               | 125                        | 314.1*, 288.1     | 18/20                 |
| LOM       | 5.62            | 352.1               | 130                        | 265.1*, 308.2     | 22/20                 |
| Luosuo    | 5.71            | 294.9               | 90                         | 277.1*, 217.1     | 12/22                 |
| DaNuo     | 5.71            | 358.1               | 130                        | 340.1*, 314.1     | 20/22                 |
| ENR       | 6.57            | 360.1               | 120                        | 316.2*, 245.0     | 22/22                 |
| ORB       | 7.32            | 396.1               | 130                        | 352.2*, 295.1     | 20/26                 |
| GAT       | 9.23            | 376.2               | 140                        | 332.0*, 261.1     | 20/22                 |
| SAR       | 9.94            | 386.1               | 130                        | 368.1*, 342.1     | 20/20                 |
| DIF       | 10.56           | 400.1               | 135                        | 382.2*, 356.1     | 20/20                 |
| SPA       | 11.18           | 393.1               | 135                        | 349.2*, 292.2     | 20/25                 |
| GEM       | 13.45           | 390.1               | 115                        | 372.2*, 313.1     | 20/32                 |
| MOX       | 13.51           | 402.2               | 135                        | 384.2*, 358.2     | 22/20                 |
| TOS       | 13.59           | 405.1               | 115                        | 387.2*, 344.0     | 20/28                 |
| BAL       | 13.95           | 390.1               | 115                        | 359.2*, 315.2     | 12/20                 |
| TIMA      | 14.27           | 418.1               | 135                        | 400.2*, 374.2     | 20/20                 |
| MILO      | 13.54           | 264.0               | 80                         | 246.0*/215.0      | 12/20                 |
| Jialei    | 16.22           | 427.1               | 120                        | 366.2*, 285.9     | 20/30                 |

**Table. S3.** Matrix effects of 24 QNs

| Analytes | ME (%) |       |
|----------|--------|-------|
|          | water  | egg   |
| LuFu     | 111.8  | 93.3  |
| ENO      | 82.4   | 112.1 |
| NOR      | 85.0   | 99.7  |
| FuLuo    | 97.9   | 106.4 |
| OFL      | 114.4  | 116.4 |
| PEF      | 94.7   | 108.3 |
| ANT      | 99.3   | 104.3 |
| CIP      | 89.0   | 102.5 |
| LOM      | 92.8   | 106.9 |
| Luosuo   | 104.3  | 108.4 |
| DaNuo    | 88.9   | 110.4 |
| ENR      | 95.8   | 83.2  |
| ORB      | 103.6  | 98.8  |
| GAT      | 97.8   | 108.6 |
| SAR      | 89.4   | 95.5  |
| DIF      | 99.4   | 88.9  |
| SPA      | 119.8  | 92.5  |
| GEM      | 82.2   | 113.7 |
| MOX      | 100.5  | 97.9  |
| TOS      | 100.6  | 113.4 |
| BAL      | 117.0  | 97.9  |
| TIMA     | 80.1   | 105.5 |
| MILO     | 80.1   | 105.5 |
| Jialei   | 85.4   | 80.3  |

**Table. S4.** The Recoveries and RSDs of 24 kinds of QNs spiked at three levels in the in water and egg samples (n=5)

| Analytes | Water                                                    |              |         | Egg                                                      |              |         |
|----------|----------------------------------------------------------|--------------|---------|----------------------------------------------------------|--------------|---------|
|          | Spiked concentration ( $\mu\text{g}\cdot\text{L}^{-1}$ ) | Recovery (%) | RSD (%) | Spiked concentration ( $\mu\text{g}\cdot\text{L}^{-1}$ ) | Recovery (%) | RSD (%) |
| LuFu     | 0.1                                                      | 84.6         | 7.84    | 2                                                        | 75.1         | 8.95    |
|          | 2                                                        | 94.9         | 4.35    | 4                                                        | 80.6         | 6.95    |
|          | 10                                                       | 94.9         | 7.60    | 40                                                       | 77.6         | 9.96    |
| ENO      | 0.1                                                      | 73.2         | 9.22    | 2                                                        | 116.2        | 9.10    |
|          | 2                                                        | 83.8         | 8.25    | 4                                                        | 97.3         | 8.25    |
|          | 10                                                       | 91.7         | 7.35    | 40                                                       | 91.5         | 9.27    |
| NOR      | 0.1                                                      | 76.6         | 4.34    | 2                                                        | 101.1        | 4.60    |
|          | 2                                                        | 83.7         | 7.93    | 4                                                        | 114.5        | 9.07    |
|          | 10                                                       | 102.1        | 4.11    | 40                                                       | 85.8         | 6.41    |
| FuLuo    | 0.1                                                      | 99.3         | 4.00    | 2                                                        | 70.5         | 7.73    |
|          | 2                                                        | 96.3         | 3.23    | 4                                                        | 72.9         | 9.39    |
|          | 10                                                       | 86.3         | 4.85    | 40                                                       | 79.9         | 7.90    |
| OFL      | 0.1                                                      | 71.6         | 8.13    | 2                                                        | 75.6         | 8.08    |
|          | 2                                                        | 93.8         | 2.15    | 4                                                        | 79.3         | 8.71    |
|          | 10                                                       | 89.7         | 5.05    | 40                                                       | 78.4         | 2.87    |
| PEF      | 0.1                                                      | 77.7         | 8.17    | 2                                                        | 72.8         | 9.03    |
|          | 2                                                        | 87.1         | 7.54    | 4                                                        | 84.4         | 9.05    |
|          | 10                                                       | 91.5         | 2.25    | 40                                                       | 81.5         | 6.80    |
| ANT      | 0.1                                                      | 80.9         | 0.95    | 2                                                        | 83.3         | 8.88    |
|          | 2                                                        | 80.6         | 8.00    | 4                                                        | 97.9         | 2.46    |
|          | 10                                                       | 91.1         | 5.92    | 40                                                       | 79.7         | 3.47    |
| CIP      | 0.1                                                      | 71.1         | 2.10    | 2                                                        | 119.7        | 8.35    |
|          | 2                                                        | 84.8         | 3.36    | 4                                                        | 90.1         | 7.56    |
|          | 10                                                       | 97.6         | 2.75    | 40                                                       | 76.9         | 7.61    |
| LOM      | 0.1                                                      | 70.4         | 7.02    | 2                                                        | 119.2        | 7.96    |
|          | 2                                                        | 87.0         | 2.87    | 4                                                        | 115.7        | 5.68    |
|          | 10                                                       | 86.2         | 3.73    | 40                                                       | 83.1         | 6.49    |

|        |     |       |       |    |       |      |
|--------|-----|-------|-------|----|-------|------|
| Luosuo | 0.1 | 73.6  | 6.68  | 2  | 71.9  | 9.25 |
|        | 2   | 87.4  | 9.61  | 4  | 73.2  | 5.96 |
|        | 10  | 106.1 | 4.99  | 40 | 83.0  | 9.30 |
| DaNuo  | 0.1 | 95.9  | 9.03  | 2  | 114.4 | 6.33 |
|        | 2   | 77.6  | 10.44 | 4  | 106.5 | 9.12 |
|        | 10  | 86.1  | 2.86  | 40 | 86.7  | 6.33 |
| ENR    | 0.1 | 89.0  | 9.80  | 2  | 75.8  | 8.06 |
|        | 2   | 87.1  | 4.07  | 4  | 79.7  | 6.12 |
|        | 10  | 91.5  | 3.09  | 40 | 86.5  | 7.05 |
| ORB    | 0.1 | 73.4  | 9.10  | 2  | 73.5  | 7.60 |
|        | 2   | 101.8 | 4.79  | 4  | 72.1  | 5.56 |
|        | 10  | 94.1  | 2.79  | 40 | 70.5  | 4.14 |
| GAT    | 0.1 | 91.2  | 5.58  | 2  | 114.8 | 7.85 |
|        | 2   | 91.1  | 3.08  | 4  | 112.7 | 5.11 |
|        | 10  | 91.8  | 3.85  | 40 | 78.9  | 5.22 |
| SAR    | 0.1 | 70.6  | 5.00  | 2  | 108.4 | 6.15 |
|        | 2   | 82.3  | 6.50  | 4  | 72.2  | 8.88 |
|        | 10  | 100.9 | 4.05  | 40 | 76.3  | 5.11 |
| DIF    | 0.1 | 71.2  | 1.58  | 2  | 76.1  | 8.66 |
|        | 2   | 95.1  | 1.95  | 4  | 76.2  | 7.65 |
|        | 10  | 94.7  | 5.55  | 40 | 82.9  | 6.63 |
| SPA    | 0.1 | 73.3  | 6.44  | 2  | 93.0  | 8.13 |
|        | 2   | 91.8  | 3.28  | 4  | 72.6  | 9.22 |
|        | 10  | 95.3  | 2.66  | 40 | 72.9  | 6.74 |
| MOX    | 0.1 | 86.9  | 9.83  | 2  | 93.2  | 5.30 |
|        | 2   | 92.5  | 3.64  | 4  | 107.5 | 3.86 |
|        | 10  | 96.9  | 5.63  | 40 | 92.46 | 4.00 |
| TOS    | 0.1 | 83.4  | 9.71  | 2  | 81.2  | 5.42 |
|        | 2   | 87.3  | 4.43  | 4  | 73.7  | 9.34 |
|        | 10  | 84.5  | 7.95  | 40 | 74.3  | 1.89 |
| GEM    | 0.1 | 84.9  | 5.83  | 2  | 96.4  | 7.45 |
|        | 2   | 76.4  | 5.05  | 4  | 107.5 | 5.33 |

|        |     |      |      |    |       |      |
|--------|-----|------|------|----|-------|------|
|        | 10  | 79.6 | 3.90 | 40 | 78.1  | 3.80 |
| BAL    | 0.1 | 74.1 | 8.91 | 2  | 105.8 | 9.05 |
|        | 2   | 95.3 | 2.32 | 4  | 114.0 | 7.20 |
|        | 10  | 95.4 | 3.74 | 40 | 89.5  | 7.64 |
| TIMA   | 0.1 | 78.8 | 4.15 | 2  | 72.1  | 6.68 |
|        | 2   | 96.6 | 2.49 | 4  | 72.8  | 7.00 |
|        | 10  | 96.2 | 3.08 | 40 | 77.6  | 4.48 |
| MILO   | 0.1 | 71.9 | 3.51 | 2  | 72.4  | 3.51 |
|        | 2   | 73.6 | 4.70 | 4  | 73.6  | 4.70 |
|        | 10  | 70.3 | 3.46 | 40 | 70.4  | 3.46 |
| JiaLei | 0.1 | 79.0 | 3.37 | 2  | 72.4  | 9.48 |
|        | 2   | 79.8 | 1.64 | 4  | 71.3  | 8.59 |
|        | 10  | 92.1 | 2.97 | 40 | 72.6  | 6.38 |

---

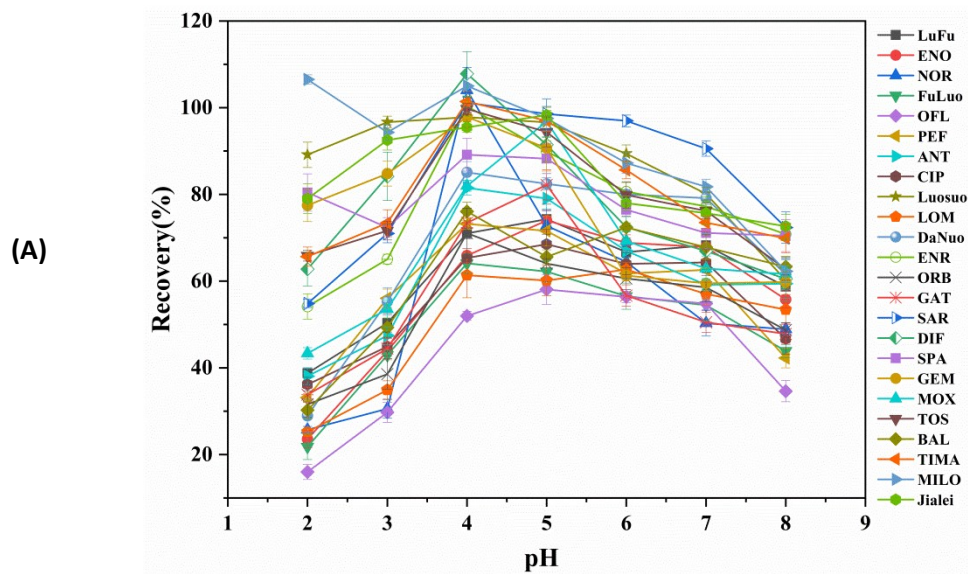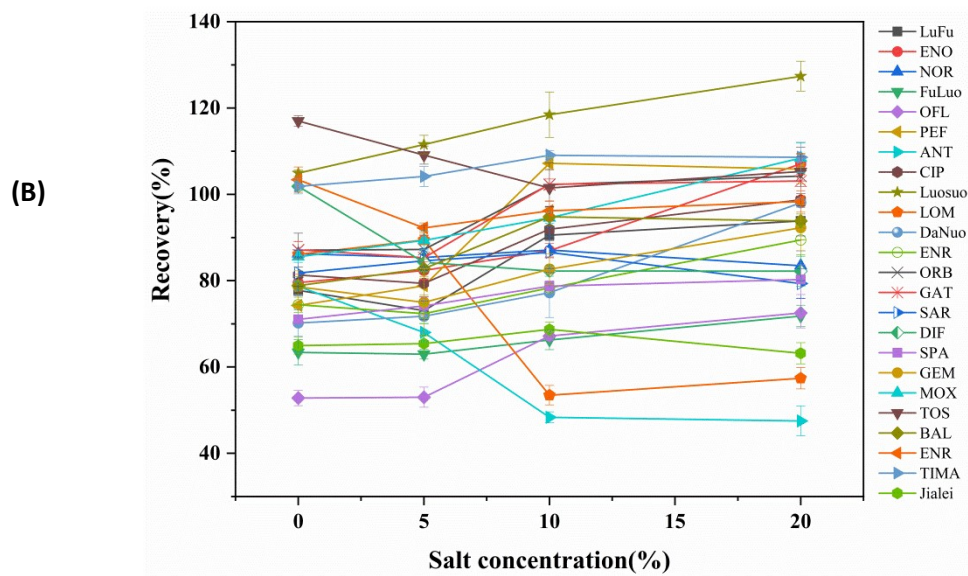

Fig. S1. Optimization of MSPE parameters: (A) pH, (B) salt concentration.



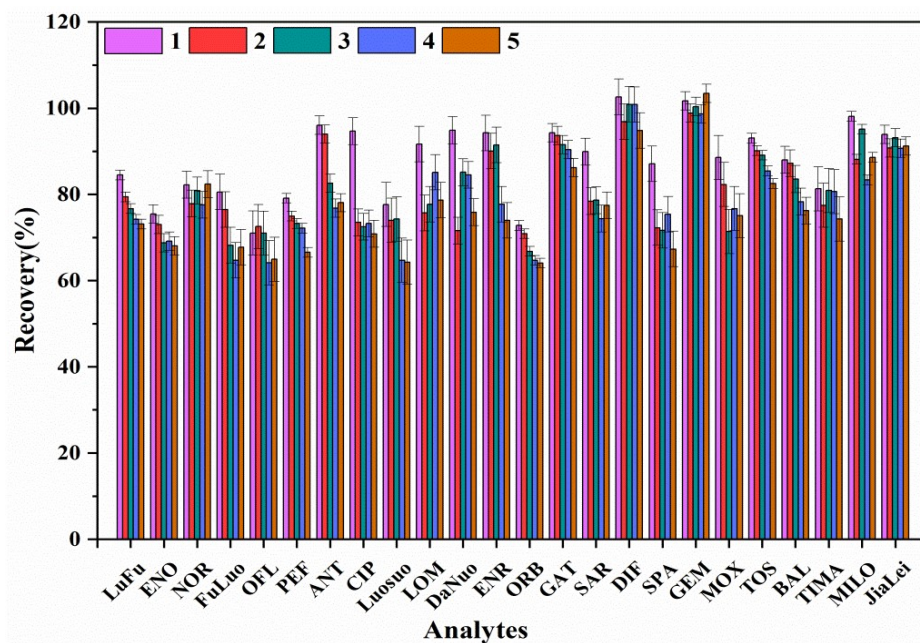

Fig. S2. Reusable times of  $\text{Fe}_3\text{O}_4@\text{SiO}_2@\text{Ah-COF}$ .

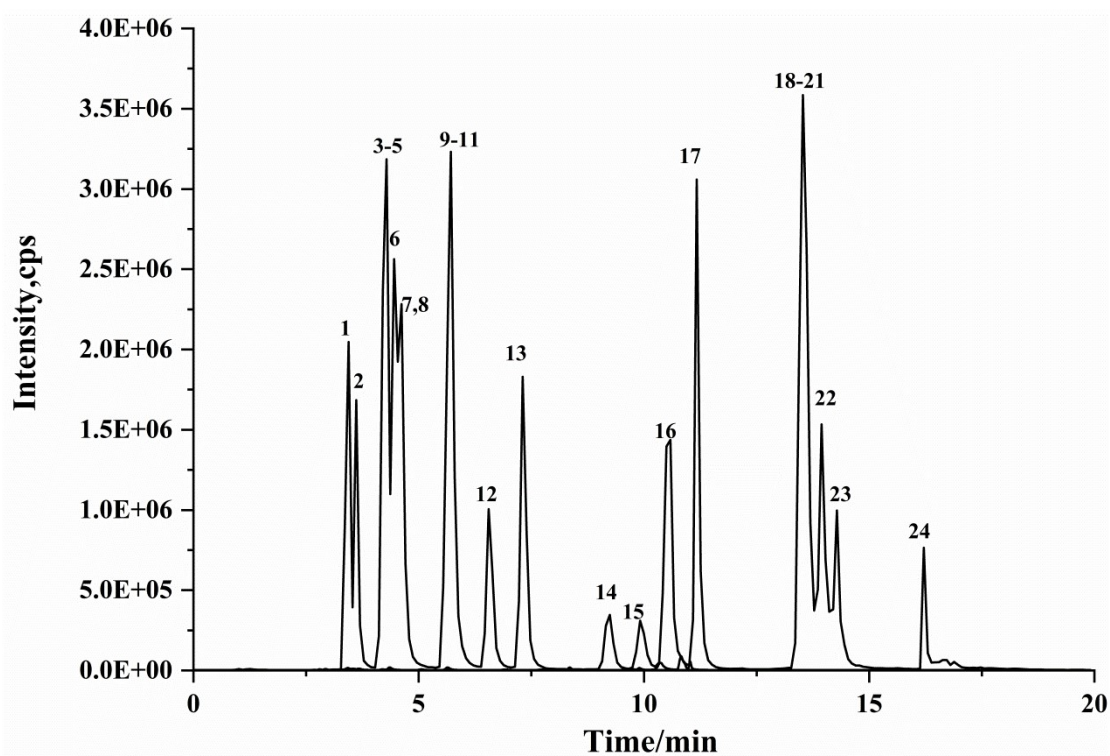

Fig. S3 Chromatograms of 24 kinds of QNs 1. LuFu 2. ENO 3. NOR 4. FuLuo 5. OFL 6. PEF 7. ANT 8. CIP 9. LOM 10. Luosuo 11. DaNuo 12. ENR 13. ORB 14. GAT 15. SAR 16. DIF 17. SPA 18. GEM 19. MOX 20. TOS 21. BAL 22. TIMA 23. MILO 24. JiaLei
